# Supplementary material for: Biochar from cookstoves reduces greenhouse gas emissions from smallholder farms in Africa
Source: Springer Nature journal article supplement (doi:10.1007/s11027-020-09920-7), 2020-06-21
Supplement: MOESM1 [file 18105032]

**Supplementary material to Sundberg et al, Biochar from cookstoves reduces greenhouse gas emissions from smallholder farms in Africa**

**Table S1. Feedstock source and use (in kg dry mass per household and year)**

Own calculations based on project data, Drigo et al. 2015; Kituyi et al. 2001a; Kituyi et al. 2001b

| Feedstock              | Source                     | Fraction of NRB | Reference system | Charcoal system | Biochar system |
|------------------------|----------------------------|-----------------|------------------|-----------------|----------------|
| Eucalyptus wood        | On farm, market            | 0%              | 1400             | 1400            | 1400           |
| Grevillea robusta wood | On farm, market            | 0%              | 1400             | 976             | 1400           |
| Acacia wood            | Off farm, market           | 43%             | 700              | 0               | 190            |
| Maize cobs             | On farm                    | 0%              | 0                | 0               | 700            |
| Conventional charcoal  | Market (20% off-farm wood) | 9%              | 450              | 0               | 0              |

**Table S2. Properties of the available primary and secondary fuels (on dry mass basis)**

Own calculations based on Njenga et al., 2016; Pennise et al., 2001; Phyllis database

| Feedstock                  | LHV [MJ/kg] | Moisture [%] | Carbon [%] | Ash [%] |
|----------------------------|-------------|--------------|------------|---------|
| Eucalyptus wood            | 16,9        | 10,7         | 45,6       | 1,4     |
| Grevillea robusta wood     | 19,6        | 10,7         | 68,0       | 5,5     |
| Acacia wood                | 18,5        | 10,7         | 42,0       | 1,0     |
| Maize cobs                 | 18,9        | 9,9          | 47,0       | 4,2     |
| Conventional charcoal      | 32,4        | 5,3          | 78,7       | 2,4     |
| Eucalyptus charcoal        | 27,1        | 7,2          | 75,7       | 3,1     |
| Grevillea robusta charcoal | 26,5        | 7,2          | 75,7       | 5,9     |
| Acacia charcoal            | 32,0        | 7,2          | 75,7       | 2,2     |
| Maize cob charcoal         | 28,7        | 8,7          | 82,8       | 5,8     |

**Table S3. Performance of stove-fuel combinations**

Own calculations based on project data, Bailis et al. 2003; Bond et al. 2004; Jain 1999; MacCarty et al. 2008; Pennise et al. 2001; Roden et al. 2006; Smith et al

| Stove                      | Feedstock                                 | Thermal efficiency [%] | Conversion efficiency [%] | Char yield [%] | Fuel carbon in [g/kg] | Solid carbon out [g/kg] | Carbon emitted [g/kg] | CO2 [g/kg] |
|----------------------------|-------------------------------------------|------------------------|---------------------------|----------------|-----------------------|-------------------------|-----------------------|------------|
| <i>Combustion</i>          |                                           |                        |                           |                |                       |                         |                       |            |
| Three-stone open fire      | Eucalyptus wood                           | 15                     | 0                         |                | 456                   | 1,2                     | 454,8                 | 1536       |
|                            | Grevillea robusta wood                    | 15                     | 0                         |                | 680                   | 1,8                     | 678,2                 | 2290       |
|                            | Acacia wood                               | 15                     | 0                         |                | 420                   | 1,5                     | 418,5                 | 1390       |
| Traditional charcoal stove | Conventional charcoal                     | 30                     | 0                         |                | 750                   | 0                       | 750                   | 2400       |
|                            | Eucalyptus charcoal                       | 40                     | 0                         |                | 757                   | 0                       | 757                   | 2423       |
|                            | Grevillea robusta charcoal                | 40                     | 0                         |                | 757                   | 0                       | 757                   | 2423       |
|                            | Acacia charcoal                           | 30                     | 0                         |                | 757                   | 0                       | 757                   | 2423       |
|                            | Maize cob charcoal                        | 32                     | 0                         |                | 828                   | 0                       | 828                   | 2341       |
| <i>Conversion</i>          |                                           |                        |                           |                |                       |                         |                       |            |
| Earth mound kiln           | Eucalyptus and Acacia wood                | 0                      | 47,3                      | 27,5           | 1600                  | 750                     | 716                   | 1897       |
| TLUD gasifier              | Eucalyptus wood                           | 21                     | 29,2                      | 18,2           | 456                   | 137                     | 319                   | 1095       |
|                            | Grevillea robusta wood                    | 21                     | 29,2                      | 21,6           | 680                   | 163                     | 517                   | 1775       |
|                            | Acacia wood                               | 21                     | 29,2                      | 16,9           | 420                   | 127                     | 293                   | 1006       |
|                            | Maize cobs                                | 19                     | 29,5                      | 19,4           | 453                   | 160                     | 293                   | 985        |
| <i>Biochar in soil</i>     | Eucalyptus and Grevillea robusta charcoal | 0                      | 0                         | 0              | 757                   | 0                       | 151                   | 555        |
|                            | Acacia charcoal                           | 0                      | 0                         | 0              | 757                   | 0                       | 151                   | 555        |
|                            | Maize cob charcoal                        | 0                      | 0                         | 0              | 828                   | 0                       | 165                   | 607        |

. 2000; Torres 2011; Whitman et al. 2010; Phyllis database

| CH4    | N2O    | CO     | NMHCs  | BC     | OC     | SO2    | RB credit  | Biochar credit |
|--------|--------|--------|--------|--------|--------|--------|------------|----------------|
| [g/kg] | [g CO2/kg] | [g CO2/kg]     |
| 2,83   | 0,07   | 60     | 7,98   | 0,282  | 0,659  | 0,40   | 1666       | 0              |
| 4,22   | 0,07   | 90     | 11,9   | 0,421  | 0,983  | 0,40   | 2485       | 0              |
| 3,20   | 0,18   | 79     | 1,60   | 0,330  | 0,770  | 0,20   | 869        | 0              |
| 18,9   | 0,25   | 274    | 3,37   | 0,183  | 0,238  | 1,26   | 2521       | 0              |
| 19,1   | 0,25   | 276    | 3,40   | 0,185  | 0,240  | 1,76   | 2774       | 0              |
| 19,1   | 0,25   | 276    | 3,40   | 0,185  | 0,240  | 1,48   | 2774       | 0              |
| 19,1   | 0,25   | 276    | 3,40   | 0,185  | 0,240  | 0,95   | 1573       | 0              |
| 18,5   | 0,25   | 400    | 3,29   | 0,357  | 0,464  | 1,65   | 3034       | 0              |
| 47,0   | 0,15   | 235    | 97,5   | 2,400  | 15,60  | 0,32   | 2407       | 0              |
| 1,64   | 0,04   | 30     | 6,87   | 0,060  | 0,352  | 0,08   | 1169       | 0              |
| 2,65   | 0,04   | 49     | 11,1   | 0,097  | 0,571  | 0,08   | 1894       | 0              |
| 1,50   | 0,04   | 28     | 6,31   | 0,055  | 0,323  | 0,04   | 609        | 0              |
| 1,47   | 0,12   | 40     | 6,18   | 0,108  | 0,634  | 0,28   | 1074       | 0              |
| 0      | 0      | 0      | 0      | 0      | 0      | 0      | 355        | 2219           |
| 0      | 0      | 0      | 0      | 0      | 0      | 0      | 316        | 1258           |
| 0      | 0      | 0      | 0      | 0      | 0      | 0      | 607        | 2427           |

**Table S4. Global Warming Potentials for for a 100-year (GWP100) or 20-year (GWP20) time horizon**

In calculations with pollutant set 1, characterisation factors for renewable biomass (RB) and non-renewable biomass (NRB) were used

In calculations with pollutant set 2, characterisation factors for NRB were used, complemented with carbon credits for RB

Bond et al. 2013; Bond et al. 2011; Fuglestedt et al. 2010; IPCC, 2013; Shindell et al. 2009

| Pollutant group        |                         | Non-renewable biomass |            | Renewable biomass |           |
|------------------------|-------------------------|-----------------------|------------|-------------------|-----------|
|                        |                         | GWP100, NRB           | GWP20, NRB | GWP100, RB        | GWP20, RB |
| <i>Pollutant set 1</i> |                         |                       |            |                   |           |
| CO <sub>2</sub>        | Kyoto gases             | 1                     | 1          | 0                 | 0         |
| CH <sub>4</sub>        | Kyoto gases             | 36                    | 87         | 34                | 86        |
| N <sub>2</sub> O       | Kyoto gases             | 298                   | 268        | 298               | 268       |
| <i>Pollutant set 2</i> |                         |                       |            |                   |           |
| CO <sub>2</sub>        | Kyoto gases             | 1                     | 1          |                   |           |
| CH <sub>4</sub>        | Kyoto gases             | 36                    | 87         |                   |           |
| N <sub>2</sub> O       | Kyoto gases             | 298                   | 268        |                   |           |
| CO                     | Ozone precursors        | 4,98                  | 18,6       |                   |           |
| NMHCs                  | Ozone precursors        | 4,23                  | 14         |                   |           |
| BC                     | Aerosols and precursors | 846                   | 3200       |                   |           |
| OC                     | Aerosols and precursors | -43,2                 | -160       |                   |           |
| SO <sub>2</sub>        | Aerosols and precursors | -71,4                 | -140       |                   |           |
